# Supplementary material for: Screening for asymptomatic coronary artery disease in patients with diabetes mellitus: A systematic review and meta-analysis of randomized trials
Source: Springer Nature journal article supplement (doi:10.1186/s12872-016-0256-9), 2016-05-10

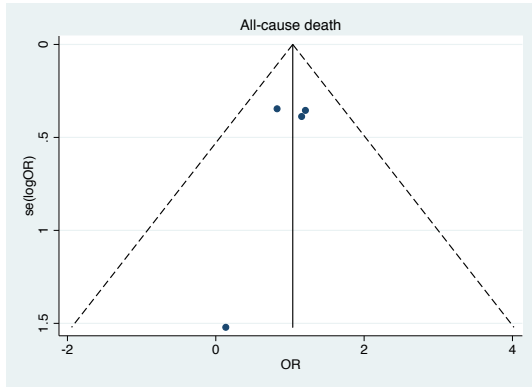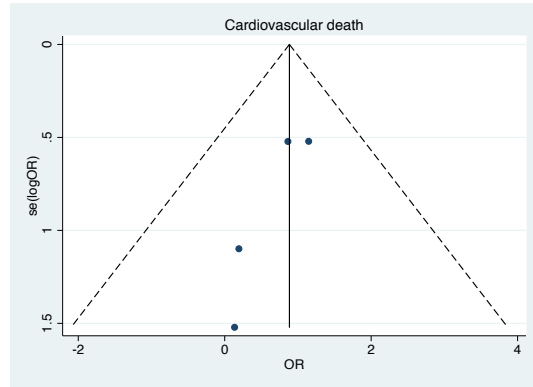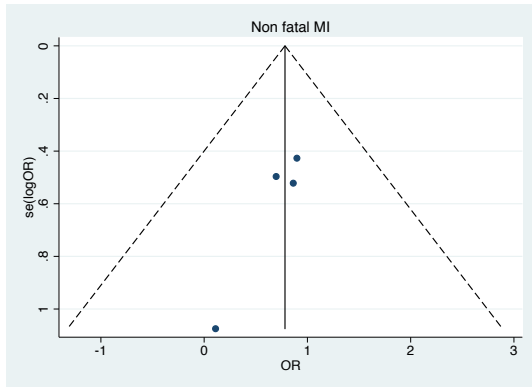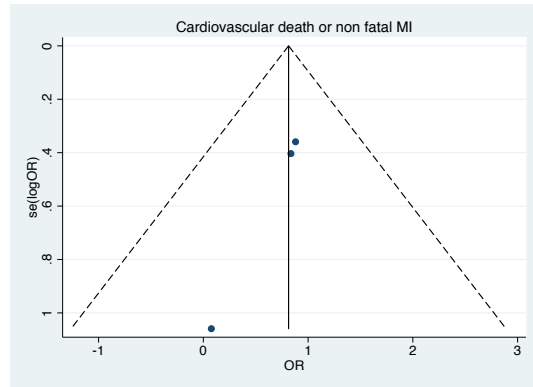

Supplement: MOESM2 [file 10110684]
